# Supplementary material for: U.S. Farmland under Threat of Urbanization: Future Development Scenarios to 2040
Source: MDPI journal article supplement (doi:10.3390/land12030574), 2023-02-27
Supplement: s1 [file s1]

## Supplementary Materials

### Text S1. Nationally significant land

Nationally significant agricultural land is defined as locations having PVR values greater than 0.429. The PVR index is a combined measurement of land productivity (crop yield per acre), versability (ability to support production and management of different crops), and resiliency (ability to maintain ecosystem services). See the AFT report [44] for more technical details.

**Table S1.** Per state agricultural lands projected to be converted to highly developed urban (UHD) and low-density residential (LDR) land use by 2040. Ag2UHD: agricultural lands converted to highly developed urban; Ag2LDR: agricultural lands converted to low-density residential use; LDR2UHD: low-density residential land converted to highly developed urban; Ag2Urban: agricultural lands converted to either highly developed urban or low-density residential use (Ag2UHD + Ag2LDR). States are ranked by Ag2Urban. Units in thousand acres.

| States         | Business-as-Usual |        |         |          | Runaway-Sprawl<br>(Ag2Urban) | Better-Built-Cities<br>(Ag2Urban) |
|----------------|-------------------|--------|---------|----------|------------------------------|-----------------------------------|
|                | Ag2UHD            | Ag2LDR | LDR2UHD | Ag2Urban |                              |                                   |
| Texas          | 1,026             | 1,167  | 420     | 2,193    | 2,770                        | 1,376                             |
| North Carolina | 222               | 975    | 189     | 1,197    | 1,678                        | 662                               |
| Tennessee      | 185               | 830    | 146     | 1,015    | 1,409                        | 565                               |
| Georgia        | 217               | 581    | 263     | 798      | 1,062                        | 475                               |
| California     | 489               | 308    | 137     | 797      | 935                          | 522                               |
| Florida        | 308               | 312    | 167     | 620      | 763                          | 410                               |
| Virginia       | 96                | 498    | 97      | 594      | 836                          | 329                               |
| Missouri       | 99                | 469    | 75      | 568      | 794                          | 309                               |
| Alabama        | 131               | 415    | 108     | 545      | 752                          | 311                               |
| Pennsylvania   | 129               | 414    | 103     | 544      | 760                          | 309                               |
| Ohio           | 153               | 371    | 97      | 518      | 697                          | 299                               |
| Wisconsin      | 169               | 348    | 102     | 517      | 688                          | 305                               |
| Mississippi    | 69                | 448    | 48      | 517      | 744                          | 275                               |
| Michigan       | 93                | 397    | 71      | 490      | 703                          | 266                               |
| Arkansas       | 80                | 406    | 57      | 485      | 669                          | 263                               |
| Oklahoma       | 144               | 314    | 62      | 457      | 606                          | 270                               |
| Kentucky       | 75                | 383    | 62      | 457      | 640                          | 251                               |
| Indiana        | 148               | 306    | 96      | 454      | 605                          | 263                               |
| New York       | 79                | 374    | 99      | 453      | 643                          | 249                               |
| South Carolina | 115               | 322    | 131     | 437      | 587                          | 258                               |
| Colorado       | 201               | 206    | 71      | 406      | 514                          | 262                               |
| Arizona        | 262               | 144    | 50      | 406      | 481                          | 270                               |
| Minnesota      | 130               | 252    | 93      | 382      | 513                          | 216                               |
| Illinois       | 191               | 173    | 98      | 364      | 449                          | 238                               |
| Louisiana      | 100               | 210    | 59      | 310      | 400                          | 190                               |
| Utah           | 138               | 63     | 29      | 200      | 233                          | 135                               |
| North Dakota   | 110               | 89     | 23      | 199      | 244                          | 126                               |
| Kansas         | 85                | 111    | 45      | 196      | 249                          | 123                               |

|                        |              |               |              |               |               |               |
|------------------------|--------------|---------------|--------------|---------------|---------------|---------------|
| New Mexico             | 65           | 122           | 25           | 186           | 245           | 96            |
| Iowa                   | 108          | 78            | 52           | 186           | 222           | 120           |
| Washington             | 70           | 112           | 50           | 183           | 229           | 113           |
| Maryland               | 45           | 135           | 52           | 180           | 250           | 100           |
| Montana                | 21           | 150           | 8            | 171           | 249           | 92            |
| West Virginia          | 12           | 148           | 8            | 160           | 231           | 85            |
| South Dakota           | 34           | 123           | 17           | 157           | 215           | 87            |
| Nevada                 | 92           | 49            | 18           | 141           | 164           | 90            |
| New Jersey             | 58           | 71            | 80           | 128           | 161           | 82            |
| Idaho                  | 43           | 66            | 23           | 110           | 143           | 62            |
| Nebraska               | 63           | 40            | 21           | 104           | 123           | 64            |
| Oregon                 | 37           | 64            | 26           | 101           | 134           | 55            |
| Wyoming                | 24           | 59            | 10           | 83            | 106           | 48            |
| Massachusetts          | 35           | 41            | 46           | 75            | 91            | 52            |
| Delaware               | 29           | 38            | 23           | 68            | 89            | 44            |
| Connecticut            | 16           | 40            | 21           | 57            | 74            | 38            |
| Maine                  | 4            | 50            | 6            | 55            | 74            | 30            |
| Vermont                | 3            | 38            | 2            | 42            | 62            | 22            |
| New Hampshire          | 12           | 24            | 12           | 36            | 43            | 23            |
| Rhode Island           | 4            | 4             | 6            | 8             | 10            | 6             |
| <b>Contiguous U.S.</b> | <b>6,020</b> | <b>12,395</b> | <b>3,503</b> | <b>18,415</b> | <b>24,404</b> | <b>10,870</b> |

**Table S2.** States with the greatest proportion of agricultural land projected to be converted to highly developed urban and low-density residential uses by 2040. Units in percent of total agricultural land.

| <b>States</b>   | <b>Business-as-Usual</b> | <b>Runaway-Sprawl</b> | <b>Better-Built-Cities</b> |
|-----------------|--------------------------|-----------------------|----------------------------|
| New Jersey      | 16                       | 20                    | 10                         |
| Connecticut     | 16                       | 21                    | 10                         |
| Massachusetts   | 15                       | 18                    | 10                         |
| Rhode Island    | 15                       | 18                    | 10                         |
| Delaware        | 13                       | 17                    | 8                          |
| North Carolina  | 12                       | 16                    | 6                          |
| New Hampshire   | 8                        | 10                    | 5                          |
| Tennessee       | 8                        | 11                    | 5                          |
| Maryland        | 8                        | 11                    | 4                          |
| South Carolina  | 8                        | 10                    | 4                          |
| Florida         | 7                        | 9                     | 5                          |
| Virginia        | 7                        | 10                    | 4                          |
| Contiguous U.S. | 2.0                      | 2.6                   | 1.1                        |

**Table S3.** Modeling assumptions for the Business-as-Usual (BAU), Runaway-Sprawl, and Better-Built-Cities scenarios.

| Scenario            | Rate of UHD conversion                                 | Rate of LDR conversion | Farmland protection        |
|---------------------|--------------------------------------------------------|------------------------|----------------------------|
| Business-as-Usual   | Historical rate, adjusted for future population growth | Historical rate        | No new farmland protection |
| Runaway-Sprawl      | Same as BAU                                            | 50% more than BAU      | No new farmland protection |
| Better-Built-Cities | 25% less than BAU                                      | 50% less than BAU      | No new farmland protection |
